# Supplementary material for: Pre-service mathematics teachers’ engagement with dynamic geometry software: Technological actions, challenges, and perceptions
Source: Research Square preprint supplement (doi:10.21203/rs.3.rs-7280810/v1), 2025-10-13
Supplement: Supplementary file 1 [file 825f7c42bb8bbbd99df0e1ee.docx]

**Appendix A**

Table A1. Tools in the GeoGebra manual

| Tools | Sub Tools | Tools | Sub Tools |
| --- | --- | --- | --- |
| Movement Tools | Move | Transformation Tools | Dilate from Point |
| Move around Point | Reflect about Circle |
| Freehand Shape | Reflect about Line |
| Pen | Reflect about Point |
| Point Tools | Point | Rotate around Point |
| Point on Object | Translate by Vector |
| Attach / Detach Point | Special Object Tools | Function Inspector |
| Intersect | Image |
| Midpoint or Center | Pen |
| Complex Number | Probability Calculator |
| Extremum | Relation |
| Roots | Text |
| Line Tools | Line | Action Object Tools | Slider |
| Segment | Text |
| Segment with Given Length | Image |
| Ray | Button |
| Polyline | Check Box |
| Vector | Input Box |
| Vector from Point | General Tools | Move Graphics View |
| Special Line Tools | Special Line Tools | Zoom In |
| Parallel Line | Zoom Out |
| Perpendicular Bisector | Show / Hide Object |
| Angle Bisector | Show / Hide Label |
| Tangents | Copy Visual Style |
| Polar or Diameter Line | Delete |
| Best Fit Line | CAS Tools | Evaluation Tools |
| Locus | Calculation Tools |
| Polygon Tools | Polygon | Analysis Tools |
| Regular Polygon | General Tools |
| Rigid Polygon | Spreadsheet Tools | Move Tools |
| Vector Polygon | Data Analysis Tools |
| Circle and Arc Tools | Circle with Centre through Point | List and Table Tools |
| Circle with Centre and Radius | Calculation Tools |
| Compass | 3D Graphics Tools | Movement Tools |
| Circle through 3 Points | Point Tools |
| Semicircle through 2 Points | Line Tools |
| Circular Arc | Special Line Tools |
| Circumcircular Arc | Polygon Tools |
| Circular Sector | Circle, Arc, and Conics Tools |
| Circumcircular Sector | Instersection Tools |
| Conic Section Tools | Ellipse | Plane Tools |
| Hyperbola | Geometric Solids Tools |
| Parabola | Sphere Tools |
| Conic through 5 Points | Measurement Tools |
| Measurement Tools | Angle | Transformation Tools |
| Angle with Given Size | Special Objects Tools |
| Distance or Length | General Tools |
| Area |  |  |
| Slope |
| List |
| Relation |
| Function Inspector |  |  |

Note. Retrieved from <https://geogebra.github.io/docs/manual/en/>

Table A2. Tools in The Geometer’s Sketchpad reference center

| Tools | Sub Tools | | Tools | Sub Tools |
| --- | --- | --- | --- | --- |
| Arrow Tools | Drag Objects | Drag a Straight Object to a Specific Angle | Compass Tool | Construct a Circle |
| Select and Deselect Objects | Select or Deselect a Single Object | Attach a Circle to an Existing Object |
| Deselect All Objects | Related Commands |
| Prevent Accidental Deselection | Construct a Circle with its Radius Point at a Specific Angle |
| Select Multiple Objects by Clicking | Straightedge Tools | Segment Tool |
| Select Multiple Objects with a Selection Rectangle | Ray Tool |
| Select Objects Using the Tab Key | Line Tool |
| Select All Objects, or All Objects of a Specific Type  Select One of Several Overlapping Objects | Related Commands |
| Select the Parents or Children of an Object | Construct a Straight Object at a Specific Angle |
| Select an Action Button | Attach a Straight Object to an Existing Object |
| Select a Moving Point | Polygon Tools | Polygon Tool |
| Other Arrow Actions | Mark a Center or Mirror | Polygon and Edges Tool |
| Edit a Calculation or Function | Polygon Edges Tool |
| Change the Value of a Parameter | Related Commands |
| Drag Labels and Edit Text | Construct a Polygon with its Edges at Specific Angles |
| Construct a Point of Intersection | Text Tool | Show or Hide a Label |
| Press an Action Button | Position or Change a Label |
| Change an Axis’ Scale | Create a Caption |
| Resize a Picture | Edit a Caption |
| Resize a Plot or Locus | Resize a Caption |
| Resize a Caption | Marker Tool | Create an Angle Marker |
| Add or Remove Table Data | Create a Tick Mark |
| How to Zoom In and Out on a Sketch | | Create a Drawing |
| Point Tool | | | Information Tool | Showing and Hiding Balloons |
| Custom Tools | | | Controlling Balloon Behavior with the Context Menu |

Note. Retrieved from <https://referencecenter.dynamicgeometry.com/gsp-reference-center/index.html?shortcuts.htm>
